# Supplementary material for: Quantitative analysis questions the role of MeCP2 as a global regulator of alternative splicing
Source: PubMed Central journal article supplement (PMC7584252; doi:10.1371/journal.pgen.1009087), 2020-10-13
Supplement: pgen.1009087.s001.pdf [file pgen.1009087.s001.pdf]

| $x$                            | $y$                            | feature( $y$ ) | $n$ | Pearson( $r$ ) | p-val  |                |
|--------------------------------|--------------------------------|----------------|-----|----------------|--------|----------------|
| $\Delta\Psi$ (KO-WT)           | mCG (WT)                       | AE             | 101 | 0.071          | 0.371  | GSE125660 [9]  |
|                                |                                | Exons          |     | 0.039          | 0.622  |                |
|                                |                                | Introns        |     | 0.035          | 0.663  |                |
| $\Delta\Psi$ (OE11x-WT)        | mCG (WT)                       | AE             | 73  | -0.006         | 0.928  |                |
|                                |                                | Exons          |     | -0.085         | 0.227  |                |
|                                |                                | Introns        |     | 0.114          | 0.102  |                |
| $\Delta\Psi$ (OE4x-WT)         | mCG (WT)                       | AE             | 120 | -0.040         | 0.636  |                |
|                                |                                | Exons          |     | -0.007         | 0.935  |                |
|                                |                                | Introns        |     | 0.077          | 0.361  |                |
| $\Delta\Psi$ (KO-WT)           | $\Delta$ mCA (KO-WT)           | AE             | 57  | -0.004         | 0.982  | GSE128186 [17] |
|                                |                                | Exons          |     | -0.029         | 0.878  |                |
|                                |                                | Introns        |     | -0.298         | 0.104  |                |
|                                | $\Delta$ mCG (KO-WT)           | AE             | 57  | 0.162          | 0.384  |                |
|                                |                                | Exons          |     |                | -0.114 | 0.542          |
|                                |                                | Introns        |     | -0.114         | 0.542  |                |
| $\Delta\Psi$ (Pv.8wk-Pv.1wk)   | $\Delta$ mCA (Pv.8wk-Pv.1wk)   | AE             | 489 | 0.066          | 0.121  | GSE103214 [20] |
|                                |                                | Exons          |     | 0.073          | 0.086  |                |
|                                |                                | Introns        |     | 0.129          | 0.002  |                |
|                                | $\Delta$ mCG (Pv.8wk-Pv.1wk)   | AE             | 489 | 0.036          | 0.404  |                |
|                                |                                | Exons          |     |                | 0.022  |                |
|                                |                                | Introns        |     | 0.059          | 0.167  |                |
| $\Delta\Psi$ (Pv.8wk-Pv.3wk)   | $\Delta$ mCA (Pv.8wk-Pv.3wk)   | AE             | 60  | -0.047         | 0.725  |                |
|                                |                                | Exons          |     |                | 0.002  |                |
|                                |                                | Introns        |     | 0.108          | 0.419  |                |
|                                | $\Delta$ mCG (Pv.8wk-Pv.3wk)   | AE             | 60  | -0.045         | 0.735  |                |
|                                |                                | Exons          |     |                | -0.255 |                |
|                                |                                | Introns        |     | 0.147          | 0.271  |                |
| $\Delta\Psi$ (Vip.8wk-Vip.1wk) | $\Delta$ mCA (Vip.8wk-Vip.1wk) | AE             | 408 | -0.052         | 0.259  |                |
|                                |                                | Exons          |     |                | -0.098 | 0.035          |
|                                |                                | Introns        |     | -0.025         | 0.583  |                |
|                                | $\Delta$ mCG (Vip.8wk-Vip.1wk) | AE             | 408 | -0.037         | 0.430  |                |
|                                |                                | Exons          |     |                | -0.027 | 0.558          |
|                                |                                | Introns        |     | -0.026         | 0.577  |                |
| $\Delta\Psi$ (Vip.8wk-Vip.3wk) | $\Delta$ mCA (Vip.8wk-Vip.3wk) | AE             | 527 | 0.034          | 0.450  |                |
|                                |                                | Exons          |     |                | -0.010 | 0.821          |
|                                |                                | Introns        |     | 0.019          | 0.680  |                |
|                                | $\Delta$ mCG (Vip.8wk-Vip.3wk) | AE             | 527 | -0.012         | 0.784  |                |
|                                |                                | Exons          |     |                | 0.025  | 0.585          |
|                                |                                | Introns        |     | -0.068         | 0.136  |                |
| $\Delta\Psi$ (DNMT-TKO-WT)     | mCG (WT)                       | AE             | 71  | 0.043          | 0.642  | GSE64910 [18]  |
|                                |                                | Exons          |     |                | -0.076 |                |
|                                |                                | Introns        |     |                | -0.200 | 0.030          |
| $\Delta\Psi$ (DNMT-TKO-WT)     | mCG (WT)                       | AE             | 71  | -0.081         | 0.340  | GSE67867 [19]  |
|                                |                                | Exons          |     | -0.153         | 0.068  |                |
|                                |                                | Introns        |     | 0.107          | 0.207  |                |
| $\Delta\Psi$ (Pro-Gra)         | $\Delta$ MeCP2 ChIP (Pro-Gra)  | AE             | 205 | 0.007          | 0.924  | GSE48307 [23]  |
|                                |                                | Exons          |     | 0.014          | 0.843  |                |
|                                |                                | Introns        |     | -0.044         | 0.535  |                |
|                                | $\Delta$ mCG (Pro-Gra)         | AE             | 205 | 0.012          | 0.862  |                |
|                                |                                | Exons          |     |                | 0.048  | 0.498          |
|                                |                                | Introns        |     | 0.009          | 0.895  |                |
